# Supplementary material for: Multimodal mental health analysis in social media
Source: PubMed Central journal article supplement (PMC7147779; doi:10.1371/journal.pone.0226248), 2020-04-10
Supplement: pone.0226248.s001.pdf [file pone.0226248.s001.pdf]

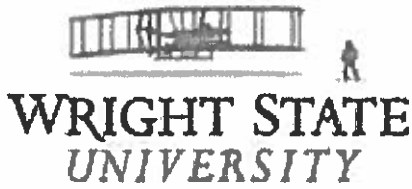

Office of Research and Sponsored Programs  
201J University Hall  
3640 Col. Glenn Hwy.  
Dayton, OH 45435-0001  
(937) 775-2425  
(937) 775-3781 (FAX)  
e-mail: [rsp@wright.edu](mailto:rsp@wright.edu)

**DATE:** July 21, 2016

**TO:** Amit Sheth, Ph.D., Faculty

Kno.e.sis

Krishnaprasad Thirunarayan, Ph.D., Faculty

**FROM:** Jodi Blacklidge   
Program Facilitator, IRB-WSU

**SUBJECT:** SC# 6258

*'Modeling Social Behavior for Healthcare Utilization and Outcomes in Depression'*

The above-listed project does not meet the Federal definition for human subjects research, specifically "a systematic investigation designed to contribute to generalizable knowledge". Therefore, the project does not require approval from the Wright State University Institutional Review Board.

If you have any questions or require additional information, please contact me at 775-3974.

Best wishes for a successful project.
